# Supplementary material for: When probabilistic seismic hazard climbs volcanoes: the Mt Etnacase, Italy – Part 2: computational implementation and first results
Source: Copernicus journal article supplement (doi:10.5194/nhess-2017-121), 2017-04-05
Supplement: Supplementary file 1 [file nhess-2017-121-supplement.pdf]

| Period<br>(s)            | a             | b <sub>1</sub> | b <sub>2</sub> | c <sub>1</sub> | c <sub>2</sub> | h            | c <sub>3</sub> | e <sub>B</sub> | e <sub>D</sub> | R <sup>2</sup> | σ <sub>eve</sub> | σ <sub>sta</sub> | σ <sub>T</sub> | RMSE         |
|--------------------------|---------------|----------------|----------------|----------------|----------------|--------------|----------------|----------------|----------------|----------------|------------------|------------------|----------------|--------------|
| <b>0.1</b>               | <b>0.859</b>  | <b>0.053</b>   | <b>0.079</b>   | <b>-2.226</b>  | <b>0.007</b>   | <b>1.424</b> | <b>0.007</b>   | <b>0.414</b>   | <b>0.421</b>   | <b>0.825</b>   | <b>0.290</b>     | <b>0.232</b>     | <b>0.441</b>   | <b>0.442</b> |
| CI95                     | -1.803        | -1.371         | -0.118         | -2.533         | -0.184         | 0.445        | 0.003          | 0.283          | 0.248          |                |                  |                  |                |              |
|                          | 3.521         | 1.476          | 0.276          | -1.919         | 0.197          | 3.293        | 0.011          | 0.544          | 0.594          |                |                  |                  |                |              |
| <i>BS<sub>mean</sub></i> | <i>0.849</i>  | <i>0.051</i>   | <i>0.080</i>   | <i>-2.220</i>  | <i>0.004</i>   | <i>1.231</i> | <i>0.007</i>   | <i>0.417</i>   | <i>0.425</i>   |                |                  |                  |                |              |
| <i>BS<sub>s</sub></i>    | <i>1.141</i>  | <i>0.609</i>   | <i>0.087</i>   | <i>0.155</i>   | <i>0.089</i>   | <i>2.865</i> | <i>0.002</i>   | <i>0.089</i>   | <i>0.100</i>   |                |                  |                  |                |              |
| <b>0.2</b>               | <b>1.062</b>  | <b>0.042</b>   | <b>0.080</b>   | <b>-2.268</b>  | <b>0.019</b>   | <b>2.697</b> | <b>0.007</b>   | <b>0.472</b>   | <b>0.567</b>   | <b>0.858</b>   | <b>0.245</b>     | <b>0.224</b>     | <b>0.395</b>   | <b>0.396</b> |
| CI95                     | -1.343        | -1.234         | -0.096         | -2.604         | -0.156         | 1.130        | 0.003          | 0.354          | 0.409          |                |                  |                  |                |              |
|                          | 3.466         | 1.318          | 0.257          | -1.933         | 0.195          | 4.263        | 0.011          | 0.590          | 0.724          |                |                  |                  |                |              |
| <i>BS<sub>mean</sub></i> | <i>1.073</i>  | <i>0.039</i>   | <i>0.082</i>   | <i>-2.285</i>  | <i>0.014</i>   | <i>2.596</i> | <i>0.007</i>   | <i>0.472</i>   | <i>0.568</i>   |                |                  |                  |                |              |
| <i>BS<sub>s</sub></i>    | <i>1.016</i>  | <i>0.537</i>   | <i>0.076</i>   | <i>0.165</i>   | <i>0.082</i>   | <i>0.943</i> | <i>0.002</i>   | <i>0.068</i>   | <i>0.075</i>   |                |                  |                  |                |              |
| <b>0.25</b>              | <b>0.993</b>  | <b>0.032</b>   | <b>0.090</b>   | <b>-2.232</b>  | <b>0.007</b>   | <b>3.172</b> | <b>0.007</b>   | <b>0.471</b>   | <b>0.518</b>   | <b>0.866</b>   | <b>0.225</b>     | <b>0.222</b>     | <b>0.376</b>   | <b>0.378</b> |
| CI95                     | -1.311        | -1.187         | -0.078         | -2.578         | -0.163         | 1.579        | 0.003          | 0.358          | 0.366          |                |                  |                  |                |              |
|                          | 3.297         | 1.250          | 0.259          | -1.886         | 0.176          | 4.765        | 0.011          | 0.584          | 0.669          |                |                  |                  |                |              |
| <i>BS<sub>mean</sub></i> | <i>0.999</i>  | <i>0.029</i>   | <i>0.091</i>   | <i>-2.232</i>  | <i>0.006</i>   | <i>3.080</i> | <i>0.007</i>   | <i>0.470</i>   | <i>0.515</i>   |                |                  |                  |                |              |
| <i>BS<sub>s</sub></i>    | <i>1.035</i>  | <i>0.551</i>   | <i>0.077</i>   | <i>0.176</i>   | <i>0.079</i>   | <i>0.910</i> | <i>0.002</i>   | <i>0.064</i>   | <i>0.075</i>   |                |                  |                  |                |              |
| <b>0.4</b>               | <b>-1.803</b> | <b>1.427</b>   | <b>-0.105</b>  | <b>-1.941</b>  | <b>0.050</b>   | <b>3.061</b> | <b>0.005</b>   | <b>0.491</b>   | <b>0.546</b>   | <b>0.883</b>   | <b>0.163</b>     | <b>0.220</b>     | <b>0.334</b>   | <b>0.335</b> |
| CI95                     | -3.847        | 0.347          | -0.255         | -2.243         | -0.100         | 1.466        | 0.001          | 0.391          | 0.412          |                |                  |                  |                |              |
|                          | 0.240         | 2.508          | 0.044          | -1.639         | 0.200          | 4.655        | 0.008          | 0.591          | 0.680          |                |                  |                  |                |              |
| <i>BS<sub>mean</sub></i> | <i>-1.832</i> | <i>1.446</i>   | <i>-0.108</i>  | <i>-1.946</i>  | <i>0.049</i>   | <i>3.038</i> | <i>0.005</i>   | <i>0.491</i>   | <i>0.546</i>   |                |                  |                  |                |              |
| <i>BS<sub>s</sub></i>    | <i>0.928</i>  | <i>0.505</i>   | <i>0.072</i>   | <i>0.146</i>   | <i>0.074</i>   | <i>0.558</i> | <i>0.002</i>   | <i>0.063</i>   | <i>0.068</i>   |                |                  |                  |                |              |
| <b>0.5</b>               | <b>-1.491</b> | <b>1.239</b>   | <b>-0.081</b>  | <b>-1.929</b>  | <b>0.123</b>   | <b>3.392</b> | <b>0.005</b>   | <b>0.485</b>   | <b>0.509</b>   | <b>0.878</b>   | <b>0.148</b>     | <b>0.236</b>     | <b>0.339</b>   | <b>0.340</b> |
| CI95                     | -3.574        | 0.143          | -0.232         | -2.252         | -0.030         | 1.709        | 0.001          | 0.383          | 0.373          |                |                  |                  |                |              |
|                          | 0.592         | 2.336          | 0.071          | -1.607         | 0.277          | 5.075        | 0.008          | 0.587          | 0.646          |                |                  |                  |                |              |
| <i>BS<sub>mean</sub></i> | <i>-1.508</i> | <i>1.248</i>   | <i>-0.081</i>  | <i>-1.935</i>  | <i>0.120</i>   | <i>3.367</i> | <i>0.005</i>   | <i>0.487</i>   | <i>0.512</i>   |                |                  |                  |                |              |
| <i>BS<sub>s</sub></i>    | <i>0.999</i>  | <i>0.529</i>   | <i>0.074</i>   | <i>0.157</i>   | <i>0.072</i>   | <i>0.620</i> | <i>0.002</i>   | <i>0.065</i>   | <i>0.069</i>   |                |                  |                  |                |              |
| <b>1</b>                 | <b>-0.628</b> | <b>0.308</b>   | <b>0.064</b>   | <b>-1.533</b>  | <b>0.239</b>   | <b>2.732</b> | <b>0.001</b>   | <b>0.465</b>   | <b>0.406</b>   | <b>0.869</b>   | <b>0.125</b>     | <b>0.265</b>     | <b>0.354</b>   | <b>0.355</b> |
| CI95                     | -2.794        | -0.835         | -0.095         | -1.837         | 0.082          | 0.722        | -0.003         | 0.359          | 0.265          |                |                  |                  |                |              |
|                          | 1.538         | 1.452          | 0.222          | -1.229         | 0.397          | 4.742        | 0.004          | 0.571          | 0.547          |                |                  |                  |                |              |
| <i>BS<sub>mean</sub></i> | <i>-0.613</i> | <i>0.298</i>   | <i>0.066</i>   | <i>-1.540</i>  | <i>0.233</i>   | <i>2.674</i> | <i>0.001</i>   | <i>0.463</i>   | <i>0.405</i>   |                |                  |                  |                |              |
| <i>BS<sub>s</sub></i>    | <i>1.098</i>  | <i>0.586</i>   | <i>0.082</i>   | <i>0.155</i>   | <i>0.077</i>   | <i>0.886</i> | <i>0.002</i>   | <i>0.069</i>   | <i>0.073</i>   |                |                  |                  |                |              |
| <b>1.25</b>              | <b>-1.856</b> | <b>0.789</b>   | <b>0.017</b>   | <b>-1.487</b>  | <b>0.188</b>   | <b>3.052</b> | <b>-0.001</b>  | <b>0.431</b>   | <b>0.367</b>   | <b>0.878</b>   | <b>0.132</b>     | <b>0.248</b>     | <b>0.341</b>   | <b>0.343</b> |
| CI95                     | -3.952        | -0.315         | -0.135         | -1.798         | 0.035          | 0.989        | -0.004         | 0.329          | 0.230          |                |                  |                  |                |              |
|                          | 0.241         | 1.893          | 0.170          | -1.177         | 0.341          | 5.116        | 0.003          | 0.534          | 0.504          |                |                  |                  |                |              |

|                          |               |              |               |               |              |              |               |              |              |              |              |              |              |              |
|--------------------------|---------------|--------------|---------------|---------------|--------------|--------------|---------------|--------------|--------------|--------------|--------------|--------------|--------------|--------------|
| <i>BS<sub>mean</sub></i> | -1.805        | 0.771        | 0.020         | -1.501        | 0.190        | 3.058        | -0.001        | 0.432        | 0.368        |              |              |              |              |              |
| <i>BS<sub>σ</sub></i>    | 0.983         | 0.512        | 0.072         | 0.170         | 0.075        | 1.001        | 0.002         | 0.066        | 0.072        |              |              |              |              |              |
| <b>2</b>                 | <b>-4.859</b> | <b>1.750</b> | <b>-0.061</b> | <b>-1.200</b> | <b>0.077</b> | <b>2.847</b> | <b>-0.004</b> | <b>0.368</b> | <b>0.349</b> | <b>0.870</b> | <b>0.156</b> | <b>0.252</b> | <b>0.355</b> | <b>0.357</b> |
| CI95                     | -7.033        | 0.601        | -0.220        | -1.516        | -0.082       | 0.248        | -0.008        | 0.262        | 0.207        |              |              |              |              |              |
|                          | -2.684        | 2.900        | 0.098         | -0.884        | 0.235        | 5.446        | -0.001        | 0.475        | 0.491        |              |              |              |              |              |
| <i>BS<sub>mean</sub></i> | -4.781        | 1.722        | -0.057        | -1.219        | 0.079        | 2.821        | -0.004        | 0.369        | 0.349        |              |              |              |              |              |
| <i>BS<sub>σ</sub></i>    | 1.070         | 0.580        | 0.082         | 0.182         | 0.082        | 1.368        | 0.002         | 0.068        | 0.073        |              |              |              |              |              |
| <b>2.5</b>               | <b>-5.108</b> | <b>1.663</b> | <b>-0.042</b> | <b>-1.100</b> | <b>0.058</b> | <b>2.615</b> | <b>-0.005</b> | <b>0.336</b> | <b>0.333</b> | <b>0.862</b> | <b>0.158</b> | <b>0.256</b> | <b>0.359</b> | <b>0.360</b> |
| CI95                     | -7.299        | 0.503        | -0.203        | -1.408        | -0.101       | 0.189        | -0.009        | 0.228        | 0.190        |              |              |              |              |              |
|                          | -2.918        | 2.823        | 0.119         | -0.791        | 0.218        | 5.420        | -0.002        | 0.443        | 0.476        |              |              |              |              |              |
| <i>BS<sub>mean</sub></i> | -4.998        | 1.623        | -0.036        | -1.135        | 0.058        | -2.675       | -0.005        | 0.334        | 0.330        |              |              |              |              |              |
| <i>BS<sub>σ</sub></i>    | 1.122         | 0.596        | 0.082         | 0.201         | 0.084        | 1.603        | 0.002         | 0.066        | 0.072        |              |              |              |              |              |
| <b>5</b>                 | <b>-3.239</b> | <b>0.339</b> | <b>0.115</b>  | <b>-1.109</b> | <b>0.186</b> | <b>0.955</b> | <b>-0.003</b> | <b>0.290</b> | <b>0.221</b> | <b>0.840</b> | <b>0.165</b> | <b>0.265</b> | <b>0.364</b> | <b>0.365</b> |
| CI95                     | -5.438        | -0.836       | -0.048        | -1.348        | 0.030        | -2.690       | -0.006        | 0.182        | 0.079        |              |              |              |              |              |
|                          | -1.041        | 1.514        | 0.278         | -0.869        | 0.342        | 4.600        | 0.001         | 0.397        | 0.364        |              |              |              |              |              |
| <i>BS<sub>mean</sub></i> | -3.115        | 0.255        | 0.127         | -1.086        | 0.189        | 0.420        | -0.003        | 0.293        | 0.225        |              |              |              |              |              |
| <i>BS<sub>σ</sub></i>    | 1.138         | 0.622        | 0.086         | 0.148         | 0.091        | 1.212        | 0.002         | 0.062        | 0.066        |              |              |              |              |              |
| <b>10</b>                | <b>-4.009</b> | <b>0.512</b> | <b>0.087</b>  | <b>-1.342</b> | <b>0.140</b> | <b>1.892</b> | <b>-0.001</b> | <b>0.357</b> | <b>0.320</b> | <b>0.862</b> | <b>0.166</b> | <b>0.245</b> | <b>0.352</b> | <b>0.353</b> |
| CI95                     | -6.146        | -0.626       | -0.071        | -1.608        | -0.013       | 0.356        | -0.004        | 0.253        | 0.181        |              |              |              |              |              |
|                          | -1.871        | 1.649        | 0.244         | -1.077        | 0.294        | 4.140        | 0.002         | 0.462        | 0.459        |              |              |              |              |              |
| <i>BS<sub>mean</sub></i> | -3.965        | 0.480        | 0.093         | -1.346        | 0.134        | 1.509        | -0.001        | 0.357        | 0.318        |              |              |              |              |              |
| <i>BS<sub>σ</sub></i>    | 1.045         | 0.561        | 0.078         | 0.148         | 0.081        | 1.365        | 0.002         | 0.064        | 0.069        |              |              |              |              |              |

Table ESM1: Regression coefficients for PSA (cm/s<sup>2</sup>) at the different periods.  $R^2$  is the determination coefficient. CI95 indicates the confidence intervals at 95% confidence level.  $BS_{mean}$  and  $BS_{\sigma}$  are the mean value and the standard deviation of each coefficient, respectively, estimated by applying the bootstrap technique.

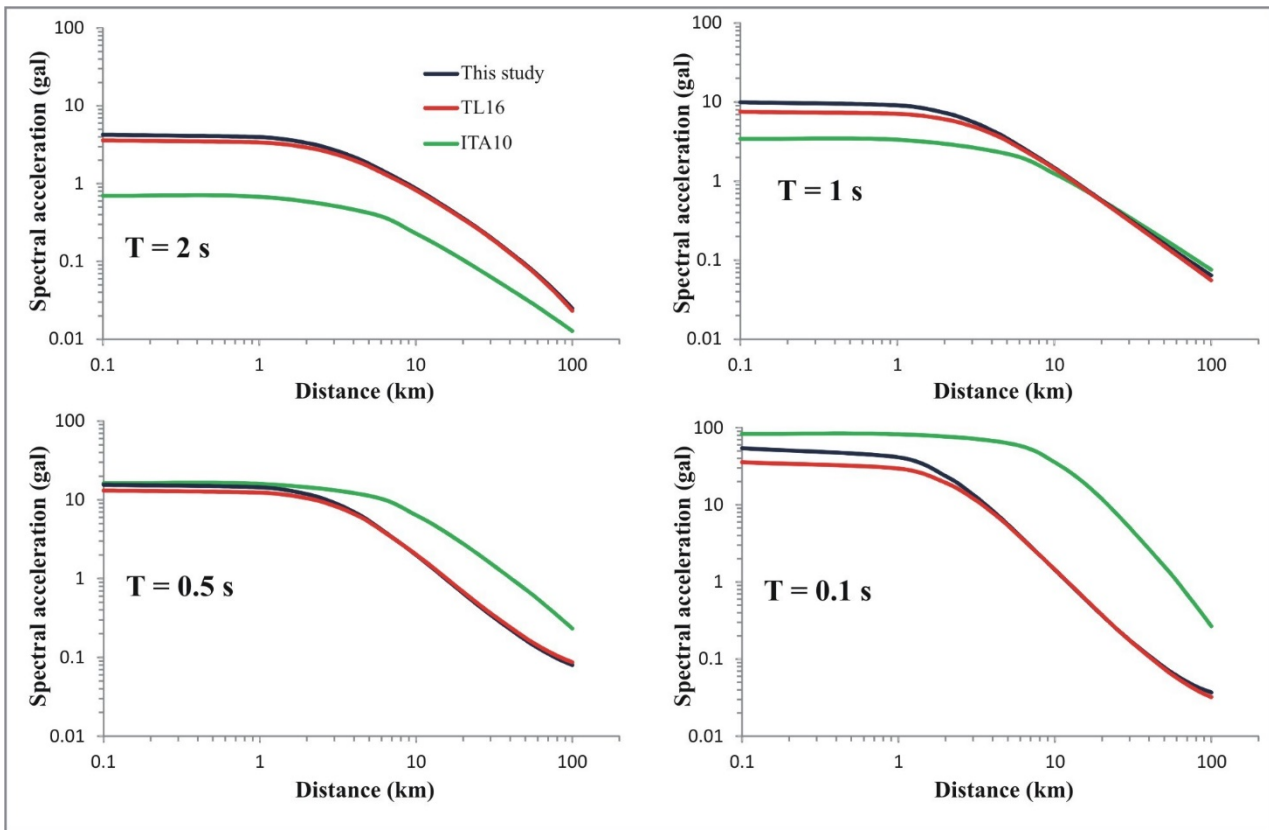

Figure ESM1: Comparison of the attenuation curves ITA10 (Bindi et al. 2011) and TL16 (Tusa and Langer, 2016) with the ones from this study for PSA considering  $M_L = 4$  and several periods  $T$ .
